# Supplementary material for: Insights into the Seasonal Olfactory Mechanism of Geosmin in Raw Water of Huangpu River
Source: MDPI journal article supplement (doi:10.3390/toxics10080485), 2022-08-19
Supplement: s1 [file s1]

# Supplementary Materials: Insights into the Seasonal Olfactory Mechanism of Geosmin in Raw Water of Huangpu River

Fei Luo, Hui Chen, Xiaoxin Wu, Lili Liu, Yuean Chen and Zhiping Wang

**Table S1.** Basic information of sampling date and water quality parameters.

| Sample No. | Date                    | Temperature |      | Weather                   | Wind                     | Turbidity (NTU) | DO     | COD  | NH <sub>3</sub> | TP   | Geosmin |
|------------|-------------------------|-------------|------|---------------------------|--------------------------|-----------------|--------|------|-----------------|------|---------|
|            |                         | High        | Low  |                           |                          |                 | (mg/L) |      |                 |      | (ng/L)  |
| 1          | 2016-03-21<br>Monday    | 15°C        | 10°C | Cloudy~<br>Overcast       | East wind 1-2 class      | 18              | 6.42   | 3.98 | 1.52            | 0.09 | 6.48    |
| 2          | 2016-04-01<br>Friday    | 22°C        | 13°C | Sunny~<br>Cloudy          | Southwest wind 1-2 class | 21              | 6.58   | 4.65 | 1.64            | 0.08 | 8.87    |
| 3          | 2016-04-14<br>Thursday  | 25°C        | 15°C | Cloudy                    | Southwest wind 1-2 class | 20              | 6.31   | 4.47 | 1.87            | 0.08 | 4.60    |
| 4          | 2016-04-26<br>Tuesday   | 19°C        | 15°C | Little ~<br>Moderate rain | East wind 1-2 class      | 35              | 6.35   | 4.51 | 1.85            | 0.07 | <0.20   |
| 5          | 2016-05-12<br>Thursday  | 28°C        | 19°C | Sunny                     | Southwest wind 1-2 class | 27              | 5.81   | 4.16 | 1.61            | 0.07 | 11.14   |
| 6          | 2016-05-26<br>Thursday  | 26°C        | 20°C | Moderate rain             | North wind 1-2 class     | 47              | 4.57   | 3.82 | 1.19            | 0.06 | 11.50   |
| 7          | 2016-06-01<br>Wednesday | 21°C        | 18°C | Moderate rain             | Northeast wind 4-5 class | 42              | 4.98   | 3.66 | 1.1             | 0.06 | <0.20   |
| 8          | 2016-06-13<br>Monday    | 28°C        | 21°C | Cloudy                    | Northeast wind 1-2 class | 28              | 4.76   | 4.18 | 1.36            | 0.07 | 5.82    |
| 9          | 2016-06-29<br>Wednesday | 27°C        | 23°C | Shower                    | South wind 1-2 class     | 32              | 4.53   | 4.57 | 1.58            | 0.07 | 3.22    |
| 10         | 2016-07-08<br>Friday    | 31°C        | 26°C | Shower                    | East wind 1-2 class      | 31              | 4.63   | 5.29 | 1.34            | 0.06 | 4.78    |
| 11         | 2016-07-21<br>Thursday  | 38°C        | 30°C | Sunny                     | Southwest wind 1-2 class | 24              | 4.31   | 5.07 | 1.34            | 0.06 | 6.03    |
| 12         | 2016-07-29<br>Friday    | 38°C        | 29°C | Thunder shower~<br>Cloudy | South wind 1-2 class     | 25              | 4.57   | 5.31 | 1.46            | 0.06 | 7.57    |
| 13         | 2016-08-12<br>Friday    | 34°C        | 28°C | Cloudy                    | Southeast wind 1-2 class | 27              | 4.24   | 5.22 | 1.32            | 0.08 | 5.72    |
| 14         | 2016-08-19<br>Friday    | 36°C        | 29°C | Sunny                     | Southeast wind 1-2 class | 22              | 4.19   | 5.58 | 1.29            | 0.08 | 6.23    |
| 15         | 2016-09-02<br>Friday    | 35°C        | 26°C | Cloudy                    | West wind 1-2 class      | 26              | 4.26   | 5.54 | 1.4             | 0.06 | 5.5     |
| 16         | 2016-09-09<br>Friday    | 31°C        | 24°C | Cloudy~<br>Overcast       | Northeast wind 1-2 class | 28              | 4.63   | 5.26 | 1.28            | 0.06 | 4.88    |
| 17         | 2016-09-26<br>Monday    | 30°C        | 24°C | Rain showers              | East wind 1-2 class      | 32              | 4.77   | 5.14 | 0.98            | 0.06 | 4.21    |
| 18         | 2016-10-10<br>Monday    | 22°C        | 18°C | Cloudy~<br>Overcast       | Northeast wind 1-2 class | 26              | 5.34   | 4.32 | 0.69            | 0.07 | <0.20   |
| 19         | 2016-10-24<br>Monday    | 23°C        | 20°C | Overcast                  | Southeast wind 1-2 class | 27              | 5.59   | 4.27 | 0.76            | 0.07 | <0.20   |

|    |                      |       |       |                              |                             |    |      |      |      |      |       |
|----|----------------------|-------|-------|------------------------------|-----------------------------|----|------|------|------|------|-------|
| 20 | 2016-11-07<br>Monday | 23 °C | 14 °C | Little ~<br>Moderate<br>rain | Southeast wind 1-2<br>class | 38 | 5.73 | 4.15 | 0.83 | 0.08 | <0.20 |
| 21 | 2016-11-29           | 13 °C | 10 °C | Overcast<br>Little rain      | Southeast wind 1-2<br>class | 35 | 5.51 | 4.92 | 1.32 | 0.09 | 20.34 |
| 22 | 2016-12-05<br>Monday | 18 °C | 9 °C  | Cloudy~<br>Overcast          | Southwest wind 1-2<br>class | 34 | 5.86 | 5.74 | 1.99 | 0.11 | 20.86 |
| 23 | 2016-12-12<br>Monday | 16 °C | 11 °C | Cloudy~<br>Little rain       | Southwest wind 1-2<br>class | 33 | 6.56 | 6.28 | 2.54 | 0.13 | 19.46 |
| 24 | 2016-12-19<br>Monday | 18 °C | 13 °C | Cloudy~<br>Little rain       | East wind 1-2 class         | 31 | 6.29 | 6.53 | 2.29 | 0.12 | 12.71 |

Rows marked with blue color are used to represent summer samples, while rows marked with gray color represented the winter samples.

**Table S2.** Samples used for microbial community analysis and the sequencing data.

| Sequencing No. | Sampling date & Type | Nucleic acid (ng/ $\mu$ L) | Absorbance 260/280 | Sequences | Coverage | Chao index | Shannon index |
|----------------|----------------------|----------------------------|--------------------|-----------|----------|------------|---------------|
| 11#            | 2016-07-21<br>Sludge | 53.3                       | 1.79               | 43813     | 0.97     | 5266.736   | 6.601554      |
| 12#            | 2016-08-12<br>Sludge | 78.1                       | 1.78               | 34084     | 0.97     | 4551.797   | 6.423157      |
| 13#            | 2016-09-02<br>Sludge | 82.5                       | 1.85               | 46676     | 0.97     | 5033.161   | 6.385886      |
| 14#            | 2016-09-09<br>Sludge | 86.6                       | 1.80               | 39470     | 0.96     | 5495.265   | 6.481221      |
| 15#            | 2016-09-26<br>Sludge | 108.5                      | 1.79               | 38934     | 0.96     | 5222.335   | 6.331765      |
| 16#            | 2016-07-21<br>Sludge | 48.6                       | 1.91               | 48942     | 0.97     | 5098.838   | 6.581536      |
| 17#            | 2016-08-12<br>Sludge | 94.9                       | 1.85               | 44160     | 0.97     | 4864.628   | 6.32521       |
| 18#            | 2016-09-02<br>Sludge | 70.6                       | 1.79               | 48445     | 0.97     | 5679.119   | 6.656059      |
| 19#            | 2016-09-09<br>Sludge | 183.5                      | 1.80               | 40688     | 0.96     | 5992.327   | 6.498348      |
| 20#            | 2016-09-26<br>Sludge | 39.4                       | 1.80               | 33880     | 0.97     | 4292.571   | 6.360061      |
| 21#            | 2016-07-21<br>Water  | 54.3                       | 1.76               | 52374     | 0.98     | 4896.708   | 6.457025      |
| 22#            | 2016-08-12<br>Water  | 48.1                       | 1.76               | 43663     | 0.97     | 5128.583   | 6.212478      |
| 23#            | 2016-09-02<br>Water  | 88.2                       | 1.85               | 50173     | 0.97     | 5433.633   | 6.36689       |
| 24#            | 2016-09-09<br>Water  | 36.9                       | 1.83               | 60663     | 0.98     | 5468.484   | 6.431954      |
| 25#            | 2016-09-26<br>Water  | 84                         | 1.83               | 47523     | 0.97     | 5353.144   | 6.231605      |
| 26#            | 2016-12-12<br>Sludge | 32.5                       | 1.86               | 53076     | 0.99     | 2148.800   | 4.280681      |
| 27#            | 2016-12-19<br>Sludge | 18.1                       | 1.95               | 47960     | 0.98     | 3706.402   | 5.606855      |
| 28#            | 2016-12-12<br>Water  | 23.1                       | 1.89               | 61724     | 0.99     | 2750.442   | 4.487307      |
| 29#            | 2016-12-19<br>Water  | 31.7                       | 1.86               | 49745     | 0.99     | 2443.396   | 4.571827      |

Rows marked with blue color are used to represent summer samples, while rows marked with gray color represented the winter samples.

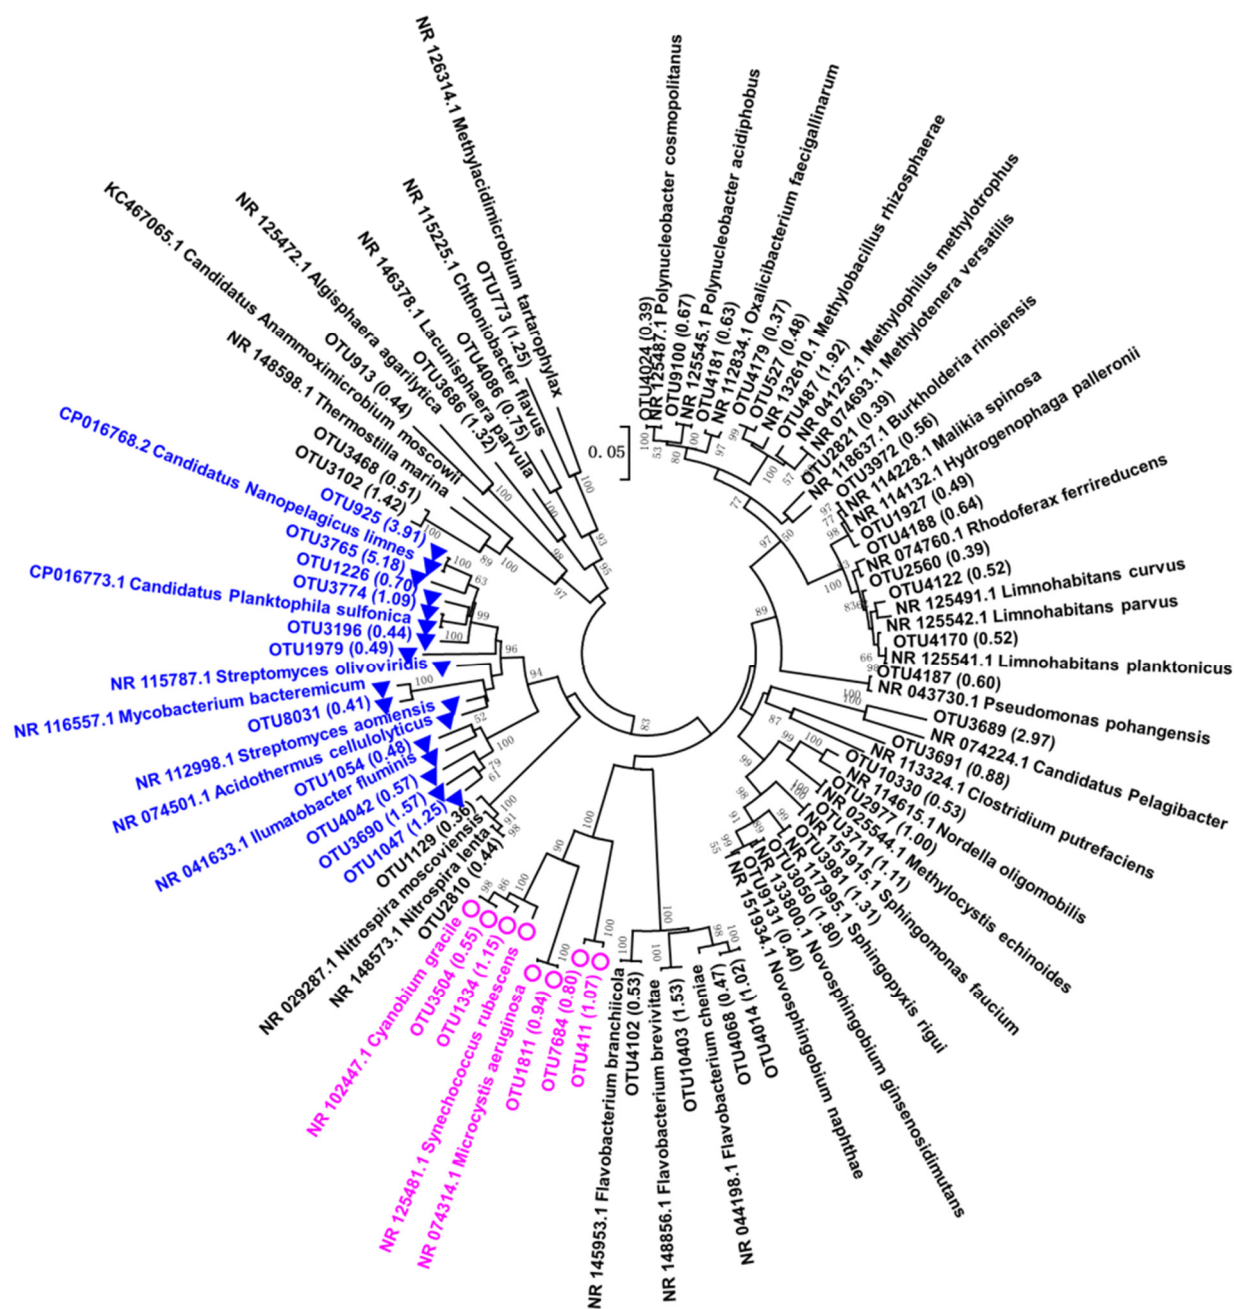

**Figure S1.** Phylogenetic tree of top 50 OTUs and the reference sequences (Blue, Actinobacteria; Pink, Cyanobacteria).
